# Supplementary material for: Controlling allostery using redox chemistryElectronic supplementary information (ESI) available: Experimental and X-ray structure determination and crystal data for [Cu(1)][PF6]. See http://www.rsc.org/suppdata/cc/b1/b109051h/
Source: Royal Society of Chemistry journal article supplement (doi:10.1039/b109051h), 2002-01-11
Supplement: b109051h.doc [file b109051h.doc]

Controlling Negative Allostery Using Redox Chemistry

## Mohammad H. Al-Sayah and Neil R. Branda*†

Department of Chemistry, University of Alberta, Edmonton, AB, Canada T6G 2G2

†Current Address: Department of Chemistry, Simon Fraser University, 8888 University Drive, Burnaby, B.C., Canada V5A 1S6. E-mail: nbranda@sfu.ca

# Supporting Information

**X-Ray structure determination of the [Cu(1)][PF6].** Single crystals were grown by slow evaporation of a CH3CN/toluene solution of the coordination compound.

**Figure 1.** Perspective view of the [Cu{(MeC5H3NC5H3NCH2NH)2C3N3OCH2-(C5H3N)2C5H4N}]+ ion showing the atom labeling scheme. Non-hydrogen atoms are represented by Gaussian ellipsoids at the 20% probability level. The hydrogen atoms attached to N4 and N5 are shown with arbitrarily small thermal parameters; all other hydrogen atoms and the PF6– counterion have been omitted.

**Table S1** Crystallographic experimental details

| *A. Crystal Data* |  |
| --- | --- |
| formula | C50H44CuF6N12OP |
| formula weight | 1037.48 |
| crystal dimensions (mm) | 0.33  0.15  0.10 |
| crystal system | Triclinic |
| space group | *P* (No. 2) |
| unit cell parameters*a* |  |
| *a*/ Å | 9.9312 (12) |
| *b*/ Å | 15.733 (2) |
| *c/* Å | 17.743 (2) |
| ** o | 72.366 (2) |
| ** o | 80.042 (3) |
| ** o | 88.735 (2) |
| *V*/Å3 | 2600.8 (6) |
| *Z* | 2 |
| **calcd (g cm-3) | 1.325 |
| *µ* (mm-1) | 0.521 |
|  |  |
| *B. Data Collection and Refinement Conditions* |  |
| diffractometer | Bruker P4/RA/SMART 1000 CCD*b* |
| radiation (** /Å) | graphite-monochromated Mo K** (0.71073) |
| temperature /°C | –80 |
| scan type | ** rotations (0.2) (30 s exposures) |
| data collection 2** limit** o | 52.92 |
| total data collected | 13106 (-11  *h*  12, -19  *k*  19, -22  *l*  21) |
| independent reflections | 10515 |
| number of observations (*NO*) | 4973 [*F*o2  2**(*F*o2)] |
| structure solution method | direct methods/fragment search (*DIRDIF–96c*) |
| refinement method | full-matrix least-squares on *F*2 (*SHELXL–93d*) |
| absorption correction method | Gaussian integration (face-indexed) |
| range of transmission factors | 0.9538–0.8566 |
| data/restraints/parameters | 10515 [*F*o2  –3**(*F*o2)] / 6*e* / 601 |
| goodness-of-fit (*S*)*f* | 1.000 [*F*o2  –3**( *F*o2)] |
| final *R* indices*g* |  |
| *R*1 [*F*o2  2**(*F*o2)] | 0.0979 |
| *wR*2 [*F*o2  –3**( *F*o2)] | 0.2995 |
| largest difference peak and hole | 1.249 and –0.787 e Å-3 |

*a*Obtained from least-squares refinement of 4023 centered reflections.

*b*Programs for diffractometer operation, data collection, data reduction and absorption correction were those supplied by Bruker.

*c*Beurskens, P. T.; Beurskens, G.; Bosman, W. P.; de Gelder, R.; Garcia Granda, S.; Gould, R. O.; Israel, R.; Smits, J. M. M. (1996). The *DIRDIF-96* program system. Crystallography Laboratory, University of Nijmegen, The Netherlands.

*d*Sheldrick, G. M. *SHELXL-93*. Program for crystal structure determination. Uni­ver­sity of Göttingen, Germany, 1993. Refinement on *F*o2 for all reflec­tions (all of these having *F*o2  ‑3**(*F*o2)). Weighted *R*-factors *wR*2 and all good­nesses of fit *S* are based on *F*o2; conventional *R*-factors *R*1 are based on *F*o, with *F*o set to zero for negative *F*o2. The observed criterion of *F*o2 > 2**(*F*o2) is used only for calculating *R*1, and is not relevant to the choice of reflections for refinement. *R*-factors based on *F*o2 are statistically about twice as large as those based on *F*o, and *R*-factors based on ALL data will be even larger.

*e*The methyl carbons of the solvent toluene molecules were refined in idealized positions: d(Cmethyl–Cipso) = 1.54 Å; d(Cmethyl…Cortho = 2.54 Å). The aromatic rings of these molecules were refined as idealized regular hexagons with a C–C bond distance of 1.39 Å.

*fS* = [*w*(*F*o2 – *F*c2)2/(*n* – *p*)]1/2 (*n* = number of data; *p* = number of parameters varied; *w* = [**2(*F*o2) + (0.1612*P*)2]-1 where *P* = [Max(*F*o2, 0) + 2*F*c2]/3).

*gR*1 = ||*F*o| – |*F*c||/|*F*o|; *wR*2 = [*w*(*F*o2 – *F*c2)2/*w*(*F*o4)]1/2.

# Experimental

**General:** CH3CN (Caledon) used for UV–VIS spectroscopy and electrochemistry was deoxygenated by bubbling argon through the solvent. All other solvents were used as received unless otherwise noted. Deuterated solvents for NMR analysis (Cambridge Isotope Laboratories) were used as received. All reagents and starting materials were purchased from Aldrich. 6-aminomethyl-6’-methyl-2,2’-bipyridine[[1]](#footnote-2) and 6-hydroxymethyl-2,2’;6’,2”-terpyridine[[2]](#footnote-3) were prepared as described in the literature. 1H NMR characterizations were performed on a Varian Inova-500 instrument, working at 499.92 MHz. Chemical shifts (**) are reported in parts per million relative to tetramethylsilane using the residual solvent peak as a reference standard. Coupling constants (*J*) are reported in Hertz. FT–IR measurements were performed using a Nicolet Magna-IR 750. UV–VIS measurements were performed using a Varian Cary 400 Scan spectrophotometer. Cyclic voltametry measurements were performed on CH3CN solutions using a PINE bipotentiostat, platinum working and counter electrodes, a Ag/AgCl reference electrode and [Bu4N][PF6] as the electrolyte. Electrolysis was performed by replacing the platinum electrode with platinum coil.

# **Synthetic Scheme**

#

# **Preparation of receptor 1.** A solution of 6-aminomethyl-6’-methyl-2,2’-bipyridine1 (0.25 g, 1.2 mmol) and triethylamine (0.13 g, 1.2 mmol) in freshly distilled THF (10 mL) was added dropwise (15–30 min) to a solution of cyanuric chloride (0.23 g, 1.2 mmol) in freshly distilled THF (20 mL) at 0C under argon. After the addition was complete, the ice bath was removed and the mixture was allowed to warm to room temperature, where it was stirred for 1 h. The reaction mixture was then heated in an oil bath at 40–50C, and an additional amount of 6-aminomethyl-6’-methyl-2,2’-bipyridine (1.2 mmol) and triethylamine (1.2 mmol) in THF (10 mL) was added dropwise. After stirring at this temperature for 5–6 h, the heating source was removed and the reaction was allowed to cool to room temperature and the solvent was removed under vacuum. The solid residue was dissolved in EtOAc (20 mL) and washed with water (3  10 mL). The combined organic layers were dried over Na2SO4, filtered and the solvent was removed under vacuum affording a crude solid that was used without further purification. The crude solid was added to a mixture of 6-hydroxymethyl-2,2’;6’,2”-terpyridine2 (0.33 g, 1.2 mmol), NaH (30 mg, 1.2 mmol) and dry THF (20 mL). After heating at reflux under argon overnight, the heating source was removed and the reaction was allowed to cool to room temperature and the solvent was removed under vacuum. The solid residue was dissolved in EtOAc (25 mL), washed with water (3  10 mL), dried over Na2SO4 and concentrated under vacuum. The residue was purified by column chromatography through alumina (1:1 hexane/EtOAc) and recrystallized from hexane/EtOAc yielding 0.4 (43%) of the product as a white solid: mp 174–176°C; 1H NMR (500 MHz, CDCl3) ** 8.68 (m, 1H), 8.61 (d, *J*=8 Hz, 1H), 8.47 (br d, *J*=8 Hz, 2H), 8.41 (d, *J*=8 Hz, 1H), 8.27 (br t, *J*=6 Hz, 2H), 8.21 (br t, *J*=6 Hz, 2H), 7.89 (br t, *J*=8 Hz, 1H), 7.84 (dt, *J*=8, 2 Hz, 2H), 7.79 (br s, 1H), 7.68 (br d, *J*=6 Hz, 4H), 7.50 (br s, 1H), 7.31 (m, 2H), 7.14 (d, *J*=8 Hz, 2H), 6.28 (br s, 2H) 5.62 (s, 2H), 4.79 (br s, 4H), 2.60 (s, 6H). 13C NMR (125.7 MHz, CDCl3) ** 167.4, 157.9, 156.7, 156.3, 155.8, 155.5, 155.3, 149.2, 137.8, 137.5, 137.1, 136.9, 123.7, 123.4, 121.7, 121.2, 120.9, 119.8, 119.6, 118.2, 69.1, 68.8, 46.2, 45.9, 24.7. FT–IR  3405.7, 3264.9, 3058.6, 2925.5, 1569.8, 151.8, 1438.6, 1427.1, 1384.6, 1336.4, 1265.1, 115.3, 1081.9, 991.2, 813.8, 779.1, 738.6, 632.5. HRMS (ES, positive ion) *m/z* 759.3046 [*M*]+ (calculated 759.3032).

**Synthesis of [Cu(1)]PF6.** A solution of **1** (50 mg, 0.07 mmol) in CHCl3/CH3CN (1:1, 3 mL) was treated with Cu(CH3CN)4PF6 (25 mg, 0.07 mmol). After stirring at room temperature for 1 h, Et2O (10 mL) was added and the red–brown precipitate that formed was collected by filtration, washed with Et2O (5 mL) and dried under vacuum affording 61 mg (95%) of the coordination compound: 1H NMR (500 MHz, CD3CN) ** 8.69 (d, *J*=4 Hz, 1H), 8.60 (d, *J*=8 Hz, 1H), 8.51 (d, *J*=8 Hz, 1H), 8.45 (d, *J*=8 Hz, 1H), 8.34 (d, *J*=9 Hz, 1H), 8.27 (d, *J*=8 Hz, 2H), 8.22 (d, *J*=8 Hz, 2H), 8.02 (t, *J*=8 Hz, 2H), 7.98 (t, *J*=8 Hz, 2H), 7.94 (t, *J*=8 Hz, 1H), 7.91 (t, *J*=6 Hz, 1H), 7.87 (t, *J*=8 Hz, 1H), 7.64 (d, *J*=8 Hz, 2H), 7.45 (d, *J*=8 Hz, 2H), 7.41 (d, *J*=6 Hz, 1H), 7.40 (d, *J*=8 Hz, 1H), 9.90 (br t, 2H), 5.37 (dd, *J*=8, 8 Hz, 2H), 4.67 (dd, *J*=14, *J*=6 Hz, 2H), 4.17 (dd, *J*=14, *J*=6 Hz, 2H), 2.08 (s, 6H). 13C NMR (125.7 MHz, CD3CN) ** 171.7, 167.8, 160.9, 158.5, 157.3, 156.7, 156.4, 156.3, 156.1, 152.5, 151.9, 150.3, 139.6, 139.3, 139.1, 138.8, 138.1, 126.8, 125.6, 125.1, 122.8, 121.9, 121.8, 121.7, 120.7, 120.5, 117.6, 69.4, 49.6, 24.9. FT–IR  3421.1, 3318.9, 3239.8, 2921.6, 285.2, 1596.8, 1579.4, 1529.3, 1429.0, 1411.6, 1336.4, 1149.4, 1062.6, 844.7, 781.0. UV–VIS (CH3CN) **max/nm (log **/M-1 cm-1) 450 (5700). HRMS (ES, positive ion) *m/z* 799.2444 [*M*]+ (calculated 799.2431).

**Preparation of [Cu(1)](OTf)2.** A solution of **1** (50 mg, 0.07 mmol) in CHCl3/CH3CN (1:1, 3 mL) was treated with Cu(OTf)2 (25 mg, 0.07 mmol). After stirring at room temperature for 1 h, Et2O (10 mL) was added and the green precipitate that formed was collected by filtration, washed with Et2O (5 mL) and dried under vacuum yielding 69 mg (93%) of the coordination compound: 1H NMR[[3]](#footnote-4)‡ (500 MHz, CD3CN) ** 8.33 (d, *J*=8 Hz, 2H), 8.22 (d, *J*=6 Hz, 2H), 8.19 (br s, 2H), 8.12 (br s, 2H), 7.78 (br s, 4H), 7.44 (d, *J*=7 Hz, 1H), 7.37 (br s, 1H), 7.25 (br s, 4H), 7.18 (br s, 2H), 6.62 (br s, 1H), 6.50 (br s, 2H), 4.78 (br d, *J*=2 Hz, 2H), 4.49 (br s, 4H), 4.36 (br s, 2H), 2.58 (s, 3H), 2.55 (s, 3H). FT–IR  3426.9, 3104.8, 2923.6, 1583.3, 1440.6, 1332.6, 1253.5, 1149.4, 1012.4, 842.7, 782.9. UV–VIS (CH3CN) **max/nm (log **/M-1 cm-1) 690 (102). LRMS (ES, positive ion) *m/z* 399.7 [*M*]2+.

1. R. Stiller and J.-M. Lehn, *Eur. J. Inorg. Chem*., 1998, **7**, 977-982. [↑](#footnote-ref-2)
2. J. Uenishi, T. Tanaka, K. Nishiwaki, S. Wakabayashi, S. Oae and H. Tsukube, *J. Org. Chem*., 1993, **58**, 4382-4388. [↑](#footnote-ref-3)
3. ‡ Due the paramagnetic effect of Cu2+ ions, this spectrum displayed very broad but measurable peaks. [↑](#footnote-ref-4)
